# Supplementary material
Source: PubMed Central journal article supplement (PMC7876895)
Supplement: advancesADV2020003513-suppl1.pdf [file advancesADV2020003513-suppl1.pdf]

**Supplementary table 1. Comparisons of COVID-19 patients without ARDS before and after recovery.**

ARDS = Acute Respiratory Distress Syndrome; ALT = Alanine Transaminase; AST = Aspartate Transaminase; LDH = Lactate Dehydrogenase

| Index<br># (mean $\pm$ SD)                           | COVID-19 without ARDS |                       | P Value * |
|------------------------------------------------------|-----------------------|-----------------------|-----------|
|                                                      | sick                  | recovered             |           |
| Number of patients (n)                               | 6                     |                       |           |
| Female/Male                                          | 3/3                   |                       |           |
| Age (#), years                                       | 46.33 ( $\pm$ 9.266)  |                       |           |
| Hospitalization Time (#), days                       | 7.5 ( $\pm$ 0.55)     |                       |           |
| Weight (#), kg                                       | 75.5 ( $\pm$ 11.40)   | 71.17 ( $\pm$ 16.70)  | 0.3701    |
| Platelet count at admission (#), $\times 10^6$ /mL   | 147.3 ( $\pm$ 69.84)  | 211.7 ( $\pm$ 62.06)  | 0.0419    |
| Lymphocyte count at admission (#), $\times 10^6$ /mL | 1.033 ( $\pm$ 0.46)   | 1.383 ( $\pm$ 0.271)  | 0.0871    |
| Platelet-Lymphocyte Ratio at admission (#)           | 148 ( $\pm$ 51.44)    | 161.5 ( $\pm$ 75.17)  | 0.3322    |
| ALT value at admission (#), U/L                      | 35.2 ( $\pm$ 13.70)   | 33.27 ( $\pm$ 13.61)  | 0.4690    |
| AST value at admission (#), U/L                      | 37.62 ( $\pm$ 17.91)  | 30.27 ( $\pm$ 18.68)  | 0.1404    |
| LDH value at admission (#), U/L                      | 653 ( $\pm$ 285.40)   | 455.8 ( $\pm$ 176.10) | 0.1534    |
| CRP (#), mg/L                                        | 18.73 ( $\pm$ 7.34)   | 8.39 ( $\pm$ 2.55)    | 0.0323    |
| D-Dimers (#), mg/L                                   | 0.77 ( $\pm$ 0.58)    | 0.54 ( $\pm$ 0.39)    | 0.2992    |
| Fibrinogen (#), mg/dL                                | 254.17 ( $\pm$ 56.44) | 251.33 ( $\pm$ 46.22) | 0.1790    |

\* Statistical Analysis: Paired t-Test to calculate P values.

**Supplementary table 2. Comparisons of COVID-19 patients with ARDS before and after recovery.**

ARDS = Acute Respiratory Distress Syndrome; ALT = Alanine Transaminase; AST = Aspartate Transaminase; LDH = Lactate Dehydrogenase

| Index<br># (mean ± SD)                                  | COVID-19 ARDS    |                   | P Value * |
|---------------------------------------------------------|------------------|-------------------|-----------|
|                                                         | sick             | recovered         |           |
| Number of patients (n)                                  | 4                |                   |           |
| Female/Male                                             | 2/2              |                   |           |
| Age (#), years                                          | 64.25 (± 20.97)  |                   |           |
| Hospitalization Time (#), days                          | 12 (± 3.37)      |                   |           |
| Weight (#), kg                                          | 71 (± 7.07)      | 71.50 (± 9.11)    | 0.7519    |
| Platelet count at admission (#), ×10 <sup>6</sup> /mL   | 139 (± 44.27)    | 197.00 (± 36.89)  | 0.1183    |
| Lymphocyte count at admission (#), ×10 <sup>6</sup> /mL | 1.05 (± 0.646)   | 2.375 (± 1.22)    | 0.0351    |
| Platelet-Lymphocyte Ratio at admission (#)              | 167.3 (± 105.2)  | 97.02 (± 40.48)   | 0.1390    |
| ALT value at admission (#), U/L                         | 44.88 (± 6.537)  | 30.13 (± 4.82)    | 0.0204    |
| AST value at admission (#), U/L                         | 47.6 (± 11.26)   | 30.78 (± 5.95)    | 0.1118    |
| LDH value at admission (#), U/L                         | 793.5 (± 142.80) | 460.00 (± 228.00) | 0.0320    |
| CRP (#), mg/L                                           | 22.50 (± 16.06)  | 10.02 (± 10.71)   | 0.0335    |
| D-Dimers (#), mg/L                                      | 1.44 (± 0.59)    | 0.89 (± 0.55)     | 0.3078    |
| Fibrinogen (#), mg/dL                                   | 428.00 (± 68.24) | 236 (± 51.87)     | 0.0255    |

\* Statistical Analysis: Paired t-Test to calculate P values.

**Supplemental Table 3 – Comorbidities**

ARDS = Acute Respiratory Distress Syndrome

| Index                             | COVID-19 without ARDS (n=11) | Medication              | ARDS           |              |                      |                            |
|-----------------------------------|------------------------------|-------------------------|----------------|--------------|----------------------|----------------------------|
|                                   |                              |                         | COVID-19 (n=9) | Medication   | Non-COVID-19 (n = 8) | Medication                 |
| Coronary Heart Disease            | 0                            |                         | 0              |              | 1                    | Propranolol                |
| Obesity + Hypertension            | 0                            |                         | 0              |              | 1                    | Losartan                   |
| Obesity + Coronary Heart Disease  | 0                            |                         | 0              |              | 1                    | Acetylsalicylic acid       |
| Type 2 Diabetes                   | 1                            | Metformin               | 1              | Metformin    | 1                    | Trimetazidine + Ivabradine |
| Diabetes + Coronary Heart Disease | 1                            | Metformin + Propranolol | 0              |              | 0                    |                            |
| Carcinoma                         | 1                            | Chemotherapy            | 1              | Chemotherapy | 0                    |                            |
| Hypertension                      | 1                            | Propranolol             | 1              | Losartan     | 0                    |                            |
|                                   |                              |                         |                |              |                      |                            |
| Other                             | 3                            | N.A.                    | 2              | N.A.         | 1                    | N.A.                       |
| Nothing to Report                 | 4                            | None                    | 4              | None         | 3                    | None                       |
